# Supplementary material for: (E)-2-(3,5-Di­meth­oxy­benzyl­idene)indan-1-one
Source: PubMed Central journal article supplement (PMC9462231; doi:10.1107/s2414314620007592), 2020-06-12
Supplement: x-05-x200759-sup5.pdf [file x-05-x200759-sup5.pdf]

|                               |             |                       |                                                                               |                             |             |                               |                     |
|-------------------------------|-------------|-----------------------|-------------------------------------------------------------------------------|-----------------------------|-------------|-------------------------------|---------------------|
| <b>Acquisition Time (sec)</b> | 2.5608      | <b>Comment</b>        | STANDARD FLUORINE PARAMETERS                                                  |                             | <b>Date</b> | Jan 25 2019                   |                     |
| <b>Date Stamp</b>             | Jan 25 2019 | <b>File Name</b>      | G:\MY DRIVE\SHULTZ GROUP\HEWITT\DATA\SLOOP COMPOUND\SLOOP_1HNMR_CDCL3.FID\FID |                             |             |                               |                     |
| <b>Frequency (MHz)</b>        | 399.87      | <b>Nucleus</b>        | 1H                                                                            | <b>Number of Transients</b> | 64          | <b>Original Points Count</b>  | 16384               |
| <b>Points Count</b>           | 16384       | <b>Pulse Sequence</b> | s2pul                                                                         | <b>Receiver Gain</b>        | 46.00       | <b>Solvent</b>                | CHLOROFORM-d        |
| <b>Spectrum Offset (Hz)</b>   | 2407.4006   | <b>Spectrum Type</b>  | STANDARD                                                                      | <b>Sweep Width (Hz)</b>     | 6397.95     | <b>Temperature (degree C)</b> | AMBIENT TEMPERATURE |

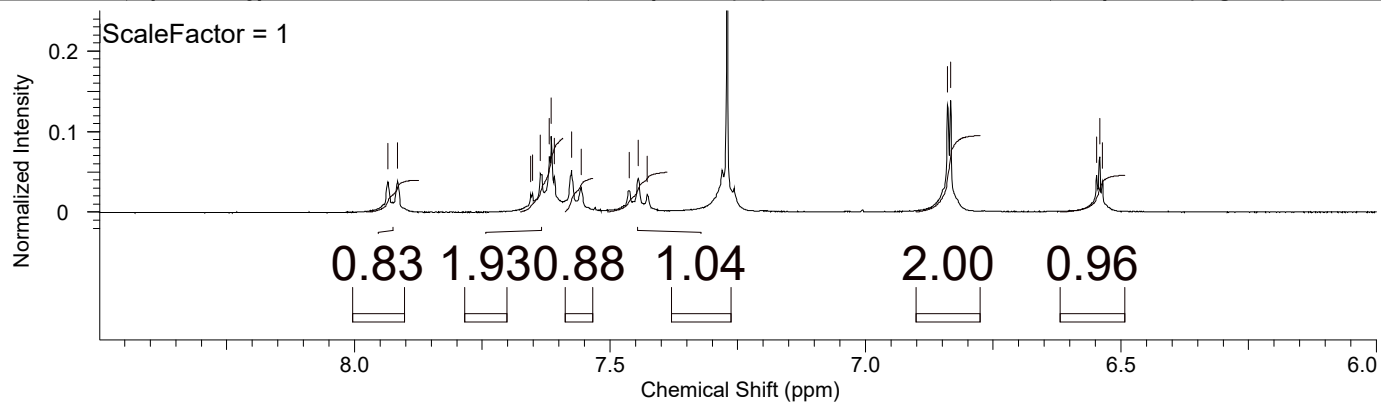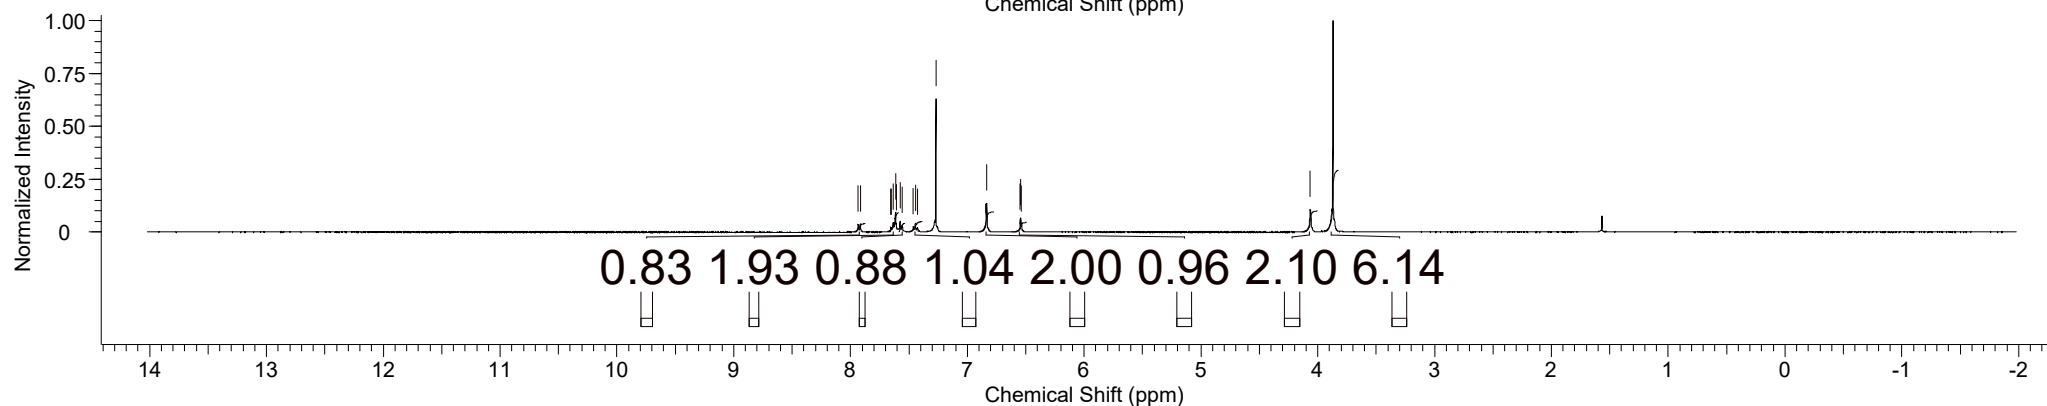

| No. | (ppm)            | Value      | Absolute Value | Non-Negative Value |
|-----|------------------|------------|----------------|--------------------|
| 1   | [3.8224 .. 3.946 | 1.14056396 | 7.04576320e+8  | 6.14056396         |
| 2   | [4.0043 .. 4.132 | 0.09750366 | 2.40670288e+8  | 2.09750366         |
| 3   | [6.4930 .. 6.610 | 0.95928574 | 1.10069696e+8  | 0.95928574         |
| 4   | [6.7751 .. 6.901 | 0.99662209 | 2.29095024e+8  | 1.99662209         |
| 5   | [7.3880 .. 7.501 | 0.03906095 | 1.19223208e+8  | 1.03906095         |
| 6   | [7.5339 .. 7.580 | 0.87936789 | 1.00899816e+8  | 0.87936789         |
| 7   | [7.5922 .. 7.671 | 0.92547262 | 2.20931232e+8  | 1.92547262         |
| 8   | [7.8743 .. 7.970 | 0.82563263 | 9.47341600e+7  | 0.82563263         |

This report was created by ACD/NMR Processor Academic Edition. For more information go to [www.acdlabs.com/nmrproc/](http://www.acdlabs.com/nmrproc/)

| No. | (ppm) | (Hz)   | Height |
|-----|-------|--------|--------|
| 1   | 7.94  | 3173.0 | 0.0376 |
| 2   | 7.92  | 3165.2 | 0.0386 |
| 3   | 7.65  | 3060.9 | 0.0222 |
| 4   | 7.65  | 3059.8 | 0.0233 |
| 5   | 7.64  | 3053.5 | 0.0482 |
| 6   | 7.62  | 3046.5 | 0.0687 |
| 7   | 7.61  | 3044.9 | 0.0945 |
| 8   | 7.61  | 3042.6 | 0.0437 |
| 9   | 7.58  | 3029.3 | 0.0520 |
| 10  | 7.56  | 3021.5 | 0.0307 |
| 11  | 7.46  | 2984.0 | 0.0265 |
| 12  | 7.44  | 2977.0 | 0.0416 |
| 13  | 7.43  | 2970.0 | 0.0216 |
| 14  | 7.27  | 2907.1 | 0.6323 |
| 15  | 6.84  | 2734.9 | 0.1334 |
| 16  | 6.83  | 2732.5 | 0.1383 |
| 17  | 6.55  | 2618.1 | 0.0457 |
| 18  | 6.54  | 2615.7 | 0.0683 |
| 19  | 6.54  | 2613.8 | 0.0386 |
| 20  | 4.06  | 1625.4 | 0.1064 |
| 21  | 3.87  | 1547.3 | 1.0000 |
